# Supplementary material
Source: PubMed Central journal article supplement (PMC3124120)

# Supplementary Data Section Figure 1

**A**

| LR-MSCs | CD73  | CD90  | CD105 | CD44  | CD45 |
|---------|-------|-------|-------|-------|------|
| LR-MSC1 | 99.89 | 99.74 | 83.96 | 99.98 | 0.01 |
| LR-MSC2 | 99.91 | 99.39 | 86.90 | 99.96 | 0.03 |
| LR-MSC3 | 99.85 | 98.38 | 88.48 | 99.84 | 0.00 |
| LR-MSC4 | 99.97 | 99.59 | 89.14 | 99.92 | 0.01 |
| LR-MSC5 | 99.28 | 99.62 | 91.45 | 99.01 | 0.02 |

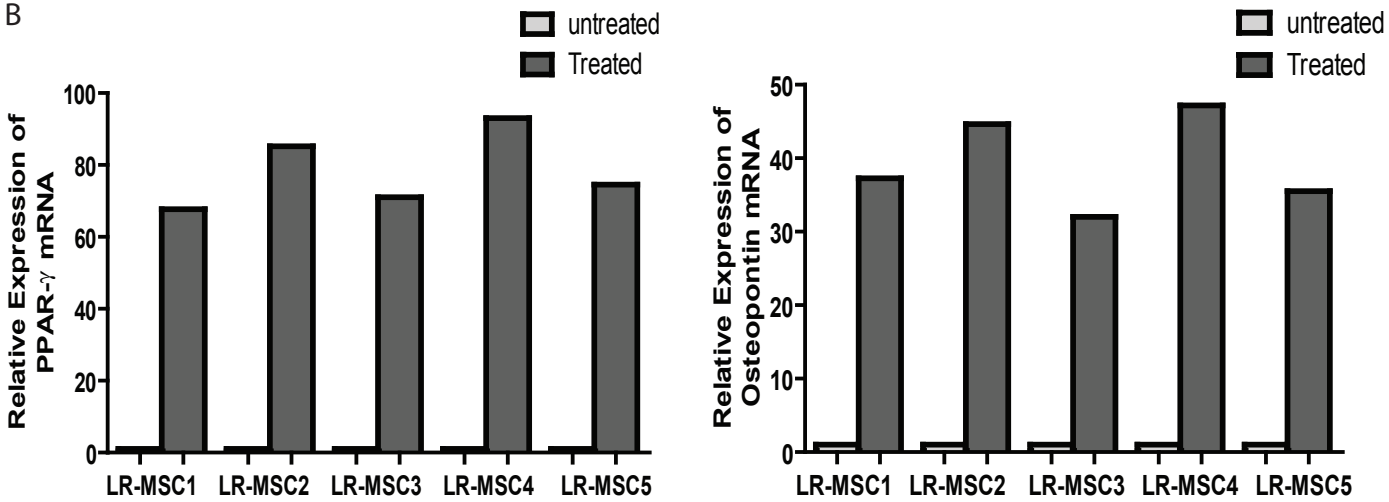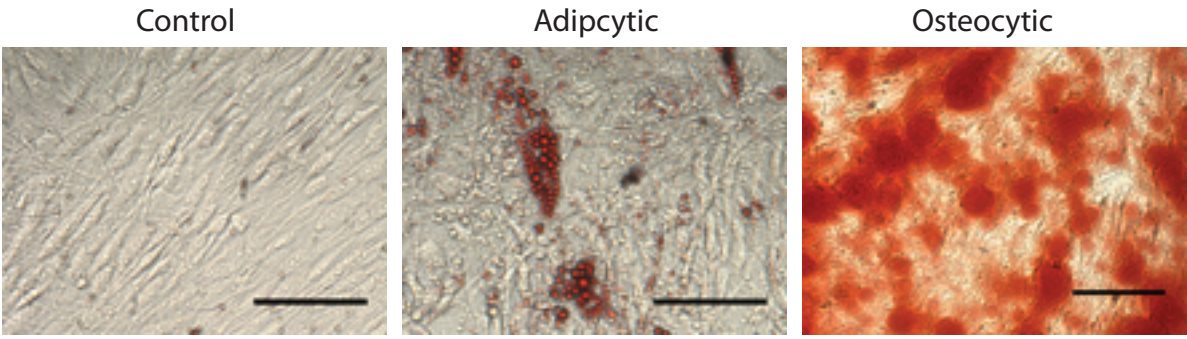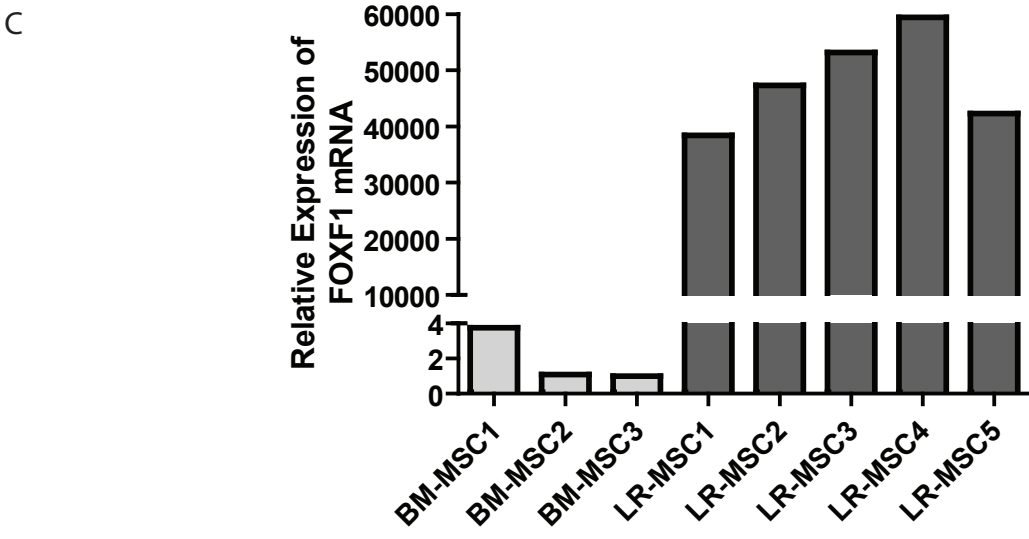

Supplement: mmc1.pdf [file mmc1.pdf]

Supplemental Figure S2

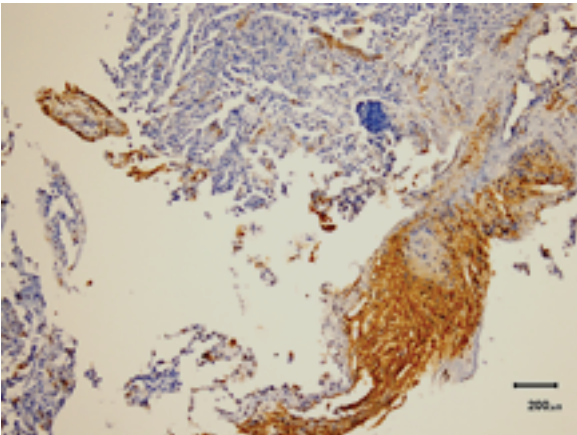

α - SMA

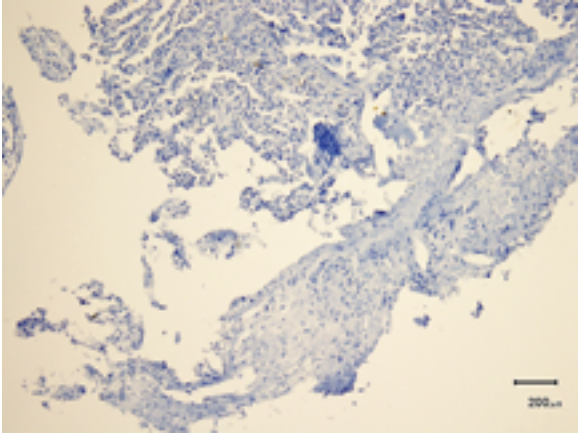

CONTROL

Supplement: mmc2.pdf [file mmc2.pdf]
